# Supplementary material
Source: publisher figshare collection journal article supplement (https://acs.figshare.com/ndownloader/files/16712858)
Supplement: Supplementary file 1 [file 16712858]

### **Detail of Supporting Information's**

Number of pages- 6 page

Number of figures- 6 figures

Number of Tables- 0

## **Enhanced Osteogenesis by Molybdenum disulfide nanosheets reinforced hydroxyapatite nanocomposite scaffolds**

*Umakant Yadav<sup>a</sup>, Himanshu Mishra<sup>b</sup>, Vimal Singh<sup>a</sup>, Sunayana Kashyap<sup>a</sup>, Anchal Srivastava<sup>b</sup>, Sanjay Yadav<sup>c\*</sup> and Preeti S. Saxena<sup>a\*</sup>*

<sup>a</sup>Department of Zoology, Institute of Science, Banaras Hindu University, Varanasi-India, 221005.

<sup>b</sup>Department of Physics, Institute of Science, Banaras Hindu University, Varanasi-India, 221005.

<sup>c</sup>Department of Orthopedics, Institute of Medical Science, Banaras Hindu University, Varanasi-India, 221005.

\*Corresponding authors

Email: [pssaxena@rediffmail.com](mailto:pssaxena@rediffmail.com) (Dr. Preeti S. Saxena)

[drsanjay.pgi@gmail.com](mailto:drsanjay.pgi@gmail.com) (Dr. Sanjay Yadav)

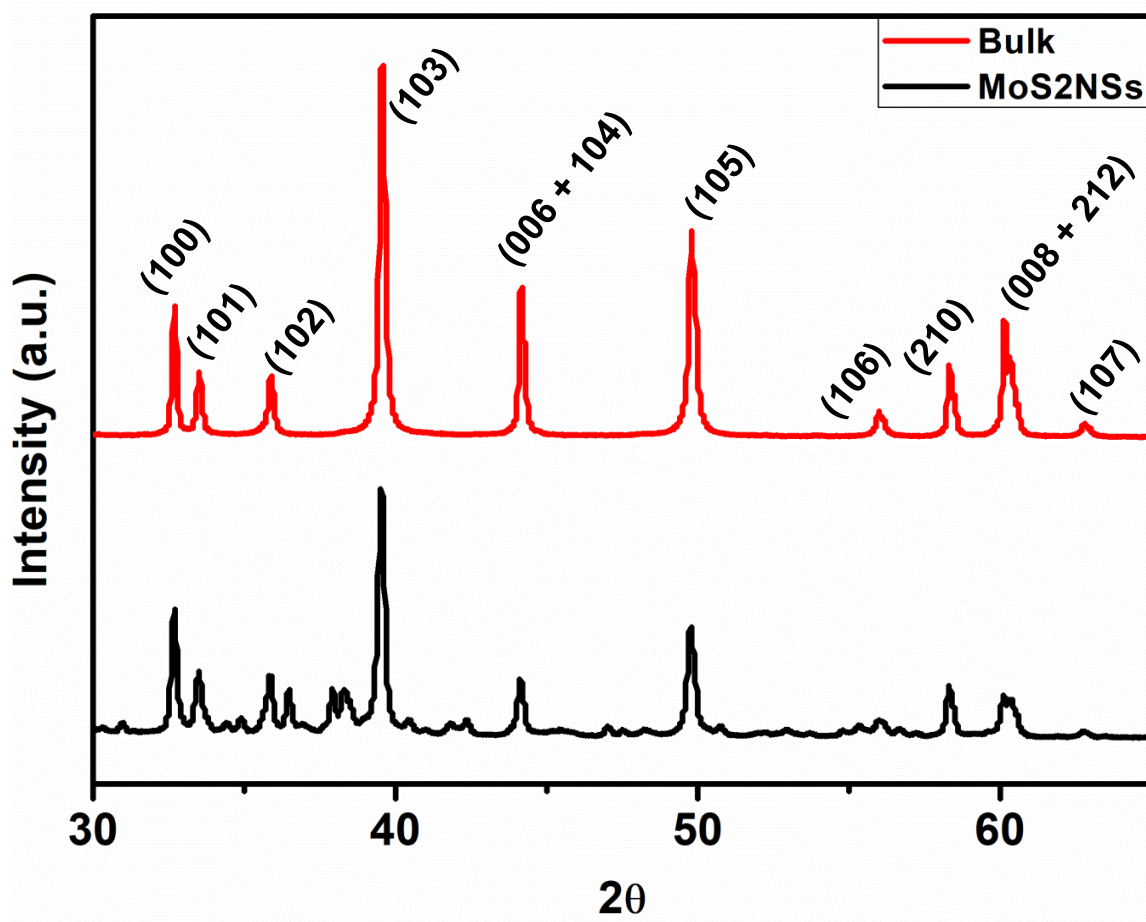

**Figure S1:** XRD Spectra of MoS<sub>2</sub>NSs and its bulk counterpart.

Figure S1 shows the XRD pattern of MoS<sub>2</sub>NSs as well as its bulk counterpart. All the XRD peaks have been successfully indexed for the 2H phase of MoS<sub>2</sub> using JCPDS card no. 75-1539.

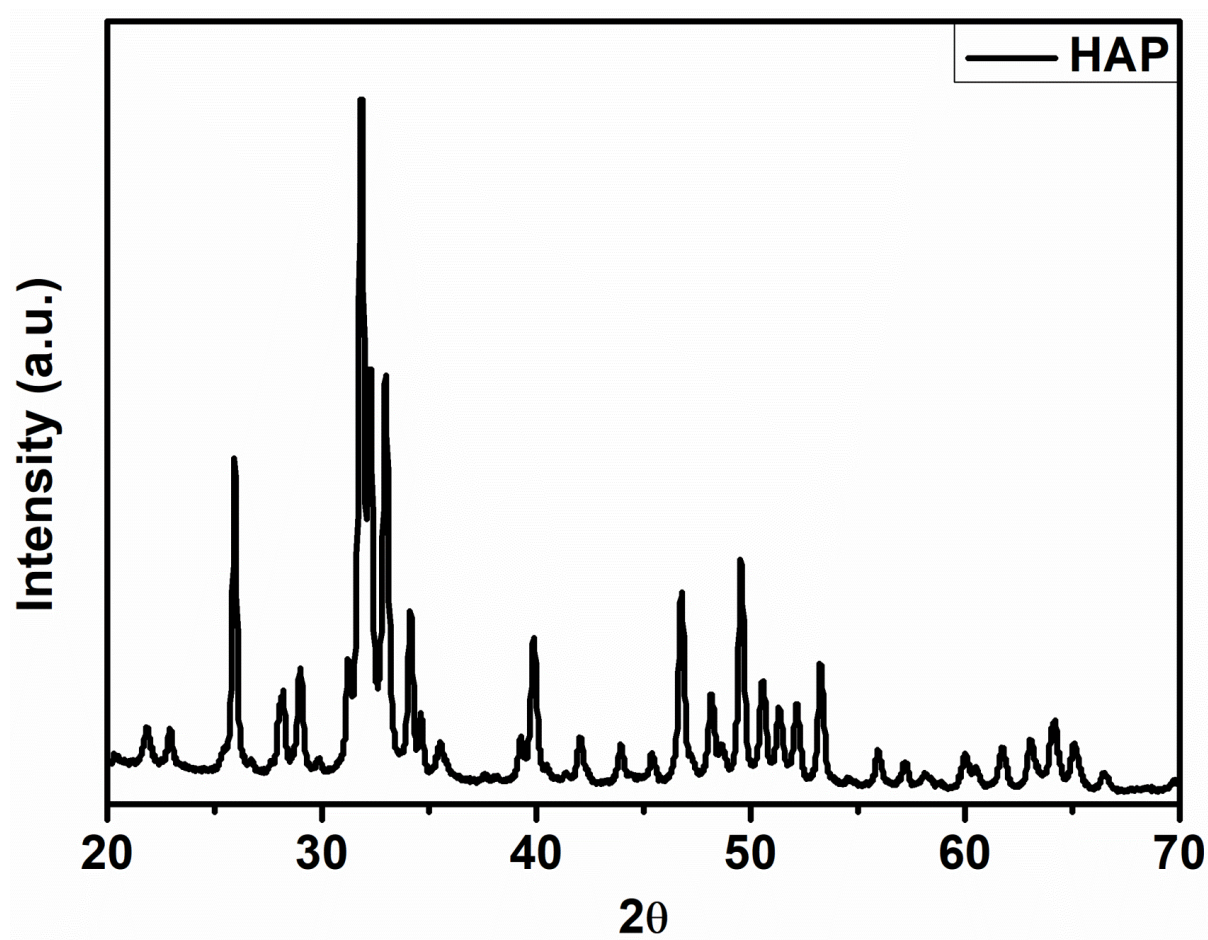

**Figure S2:** XRD spectra of HAP.

Figure S2 shows the XRD spectrum of HAP. All the peaks match well with ICDD standard (01-072-1243).

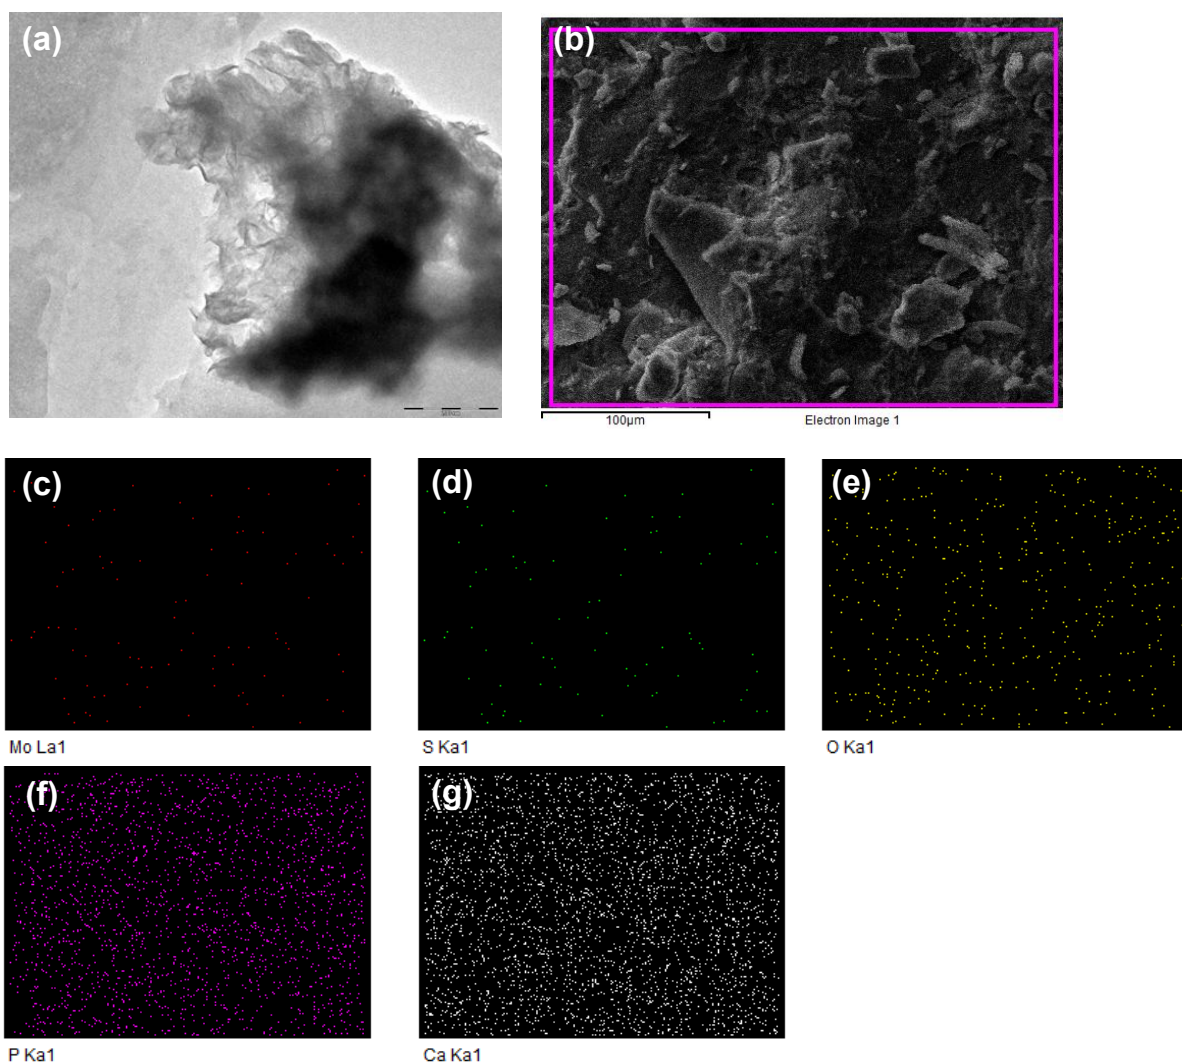

**Figure S3:** (a) TEM image of MoS<sub>2</sub>NSs. (b) shows the SEM image of the sample area used for elemental mapping. (c), (d), (e), (f) and (g) show the elemental mapping of the scaffolds corresponding to Mo, S, O, P and Ca respectively.

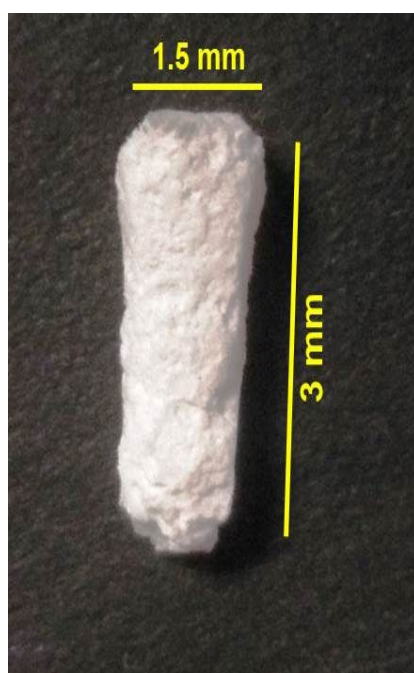

**Figure S4:** Macroscopic image of scaffold

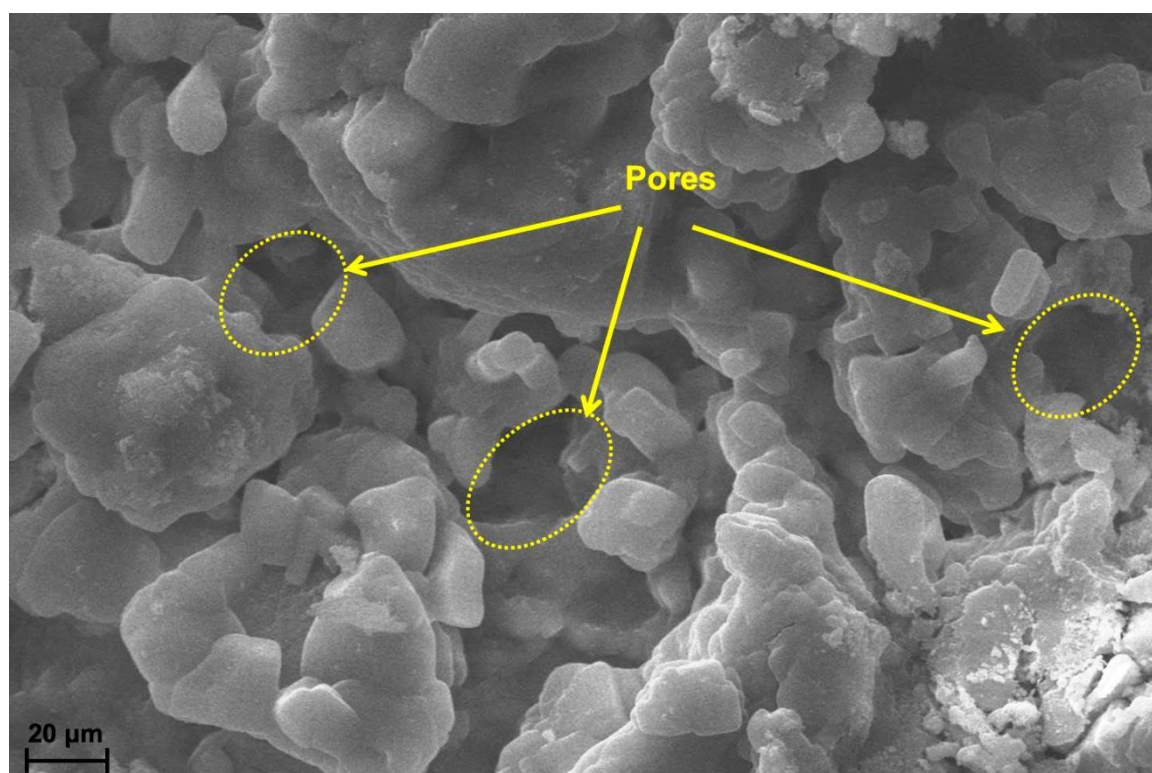

**Figure S5:** (a) SEM image of HAP-Gel nanocomposite scaffolds showing various pores with variable pore size.



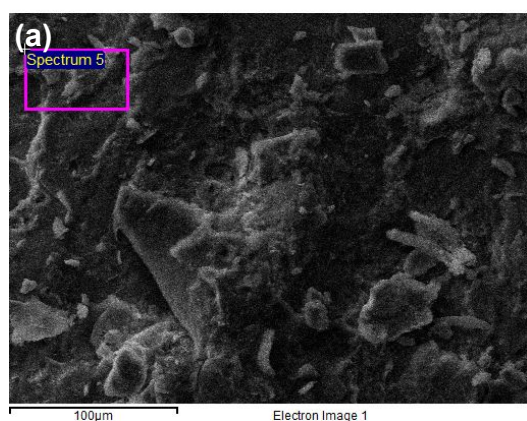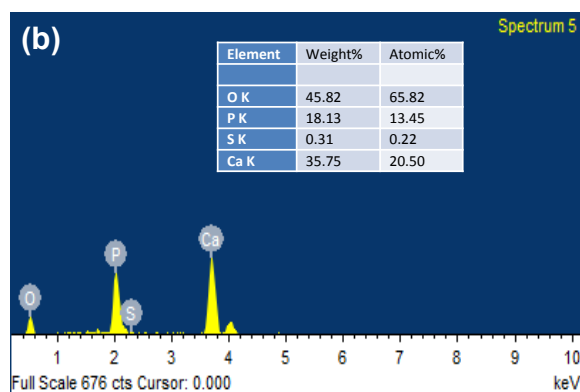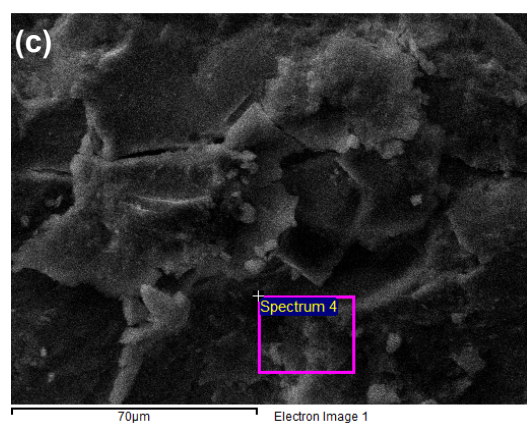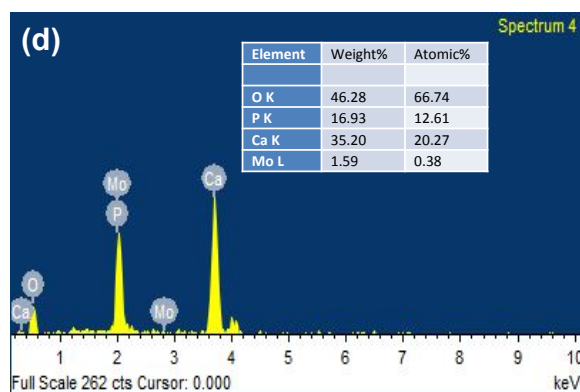

**Figure S6:** (a) and (c) shows the SEM image of the sample with marking region used for EDAX. (b) and (d) represent the EDAX color image and with element percentage.
